# Supplementary material for: Green Synthesis of Thermo-Responsive Hydrogel from Oil Palm Empty Fruit Bunches Cellulose for Sustained Drug Delivery
Source: MDPI journal article supplement (doi:10.3390/polym13132153), 2021-06-29
Supplement: s1 [file s1]

# **Supplementary Material of “GREEN SYNTHESIS OF THERMO-RESPONSIVE HYDROGEL FROM OIL PALM EMPTY FRUIT BUNCHES CELLULOSE FOR SUSTAINED DRUG DELIVERY”**

## Supplementary figures

|                                                                                                                                                                                 |   |
|---------------------------------------------------------------------------------------------------------------------------------------------------------------------------------|---|
| Figure S1 Schematic illustration of PF127 micelles formation and its interaction with OPEFB extracted cellulose for the synthesis of thermo-responsive cellulose hydrogel ..... | 2 |
| Figure S2 Swelling mechanism of thermo-responsive cellulose hydrogel .....                                                                                                      | 3 |
| Figure S3 Linear regression of kinetic and mechanism models (a) Zero-order model (b) First-order model (c) Higuchi model (d) Korsmeyer- peppas model .....                      | 5 |
| Figure S4 SSD release from thermo-responsive cellulose hydrogels by different mechanisms.....                                                                                   | 6 |

## Supplementary tables

|                                                                                                                    |   |
|--------------------------------------------------------------------------------------------------------------------|---|
| Table S1 Concentration of SSD released from thermo-responsive cellulose hydrogels at different time interval ..... | 7 |
|--------------------------------------------------------------------------------------------------------------------|---|

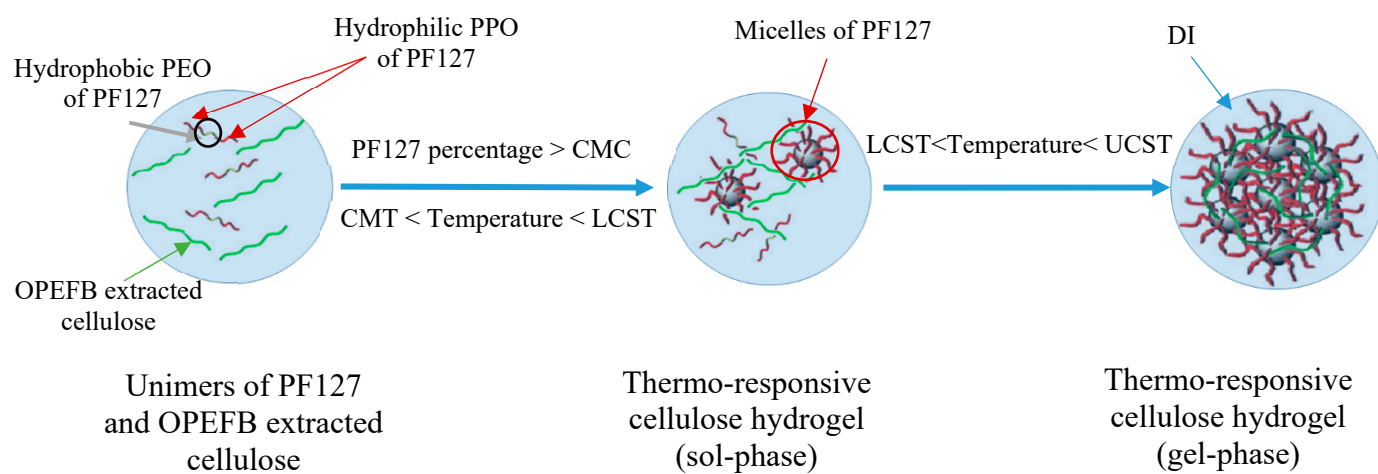

Figure S1 Schematic illustration of PF127 micelles formation and its interaction with OPEFB extracted cellulose for the synthesis of thermo-responsive cellulose hydrogel

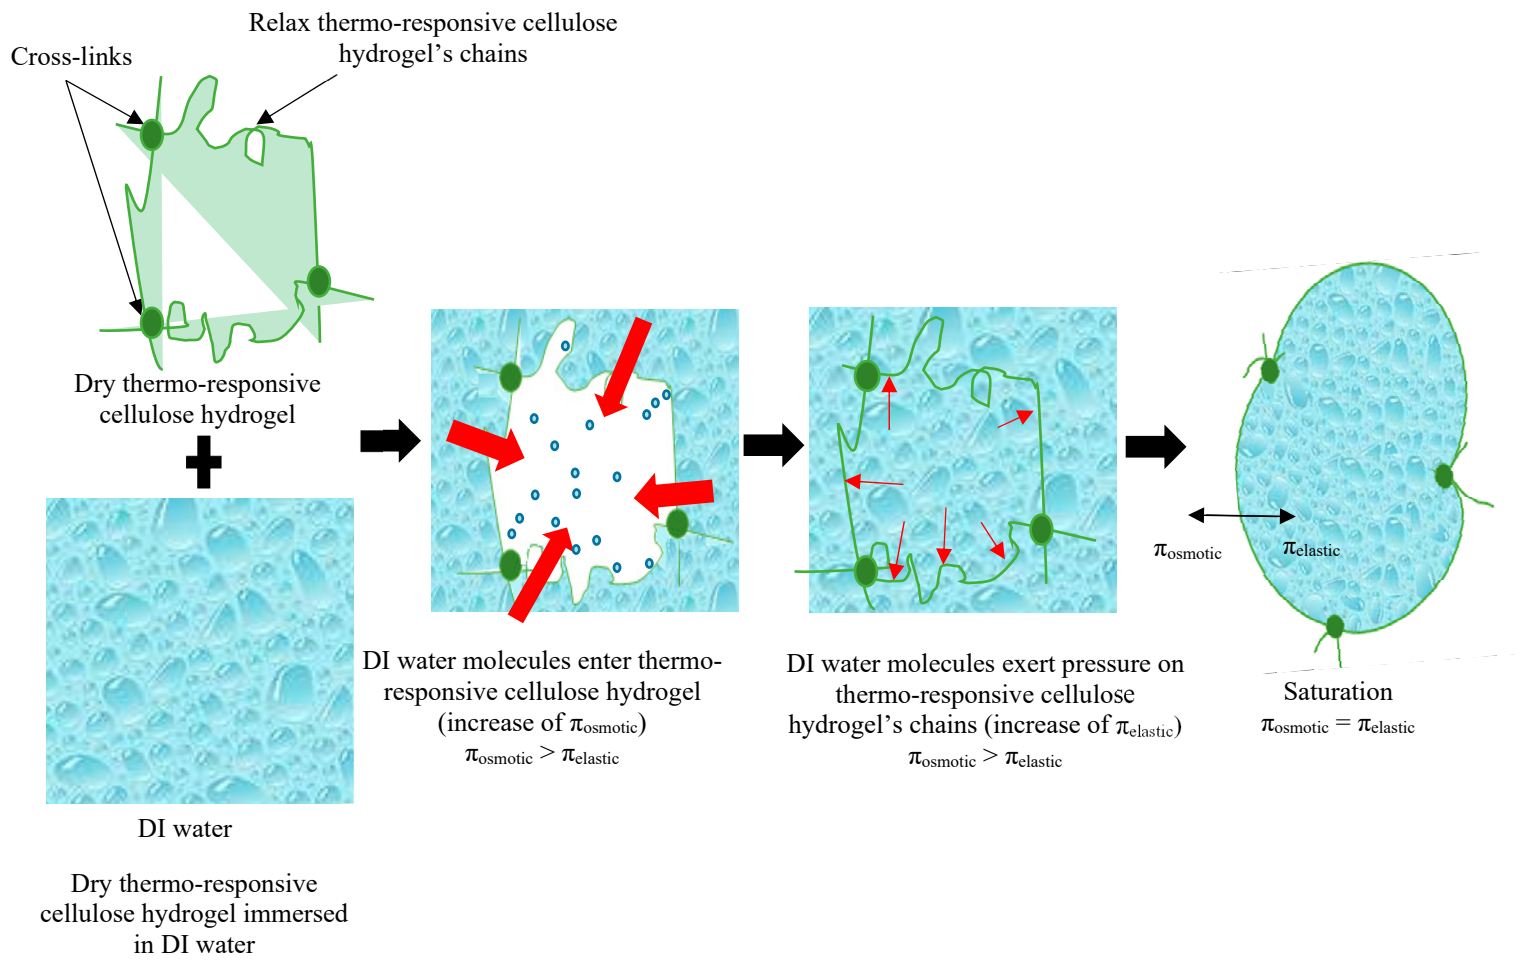

Figure S2 Swelling mechanism of thermo-responsive cellulose hydrogel

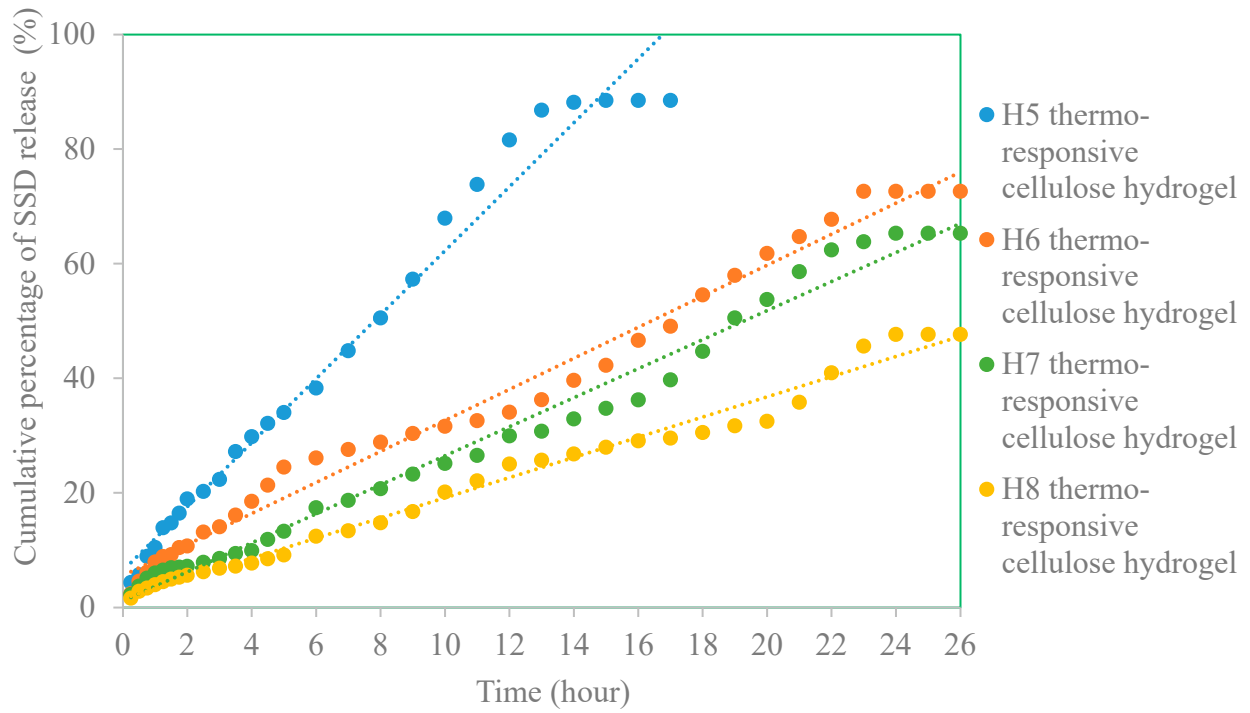

(a)

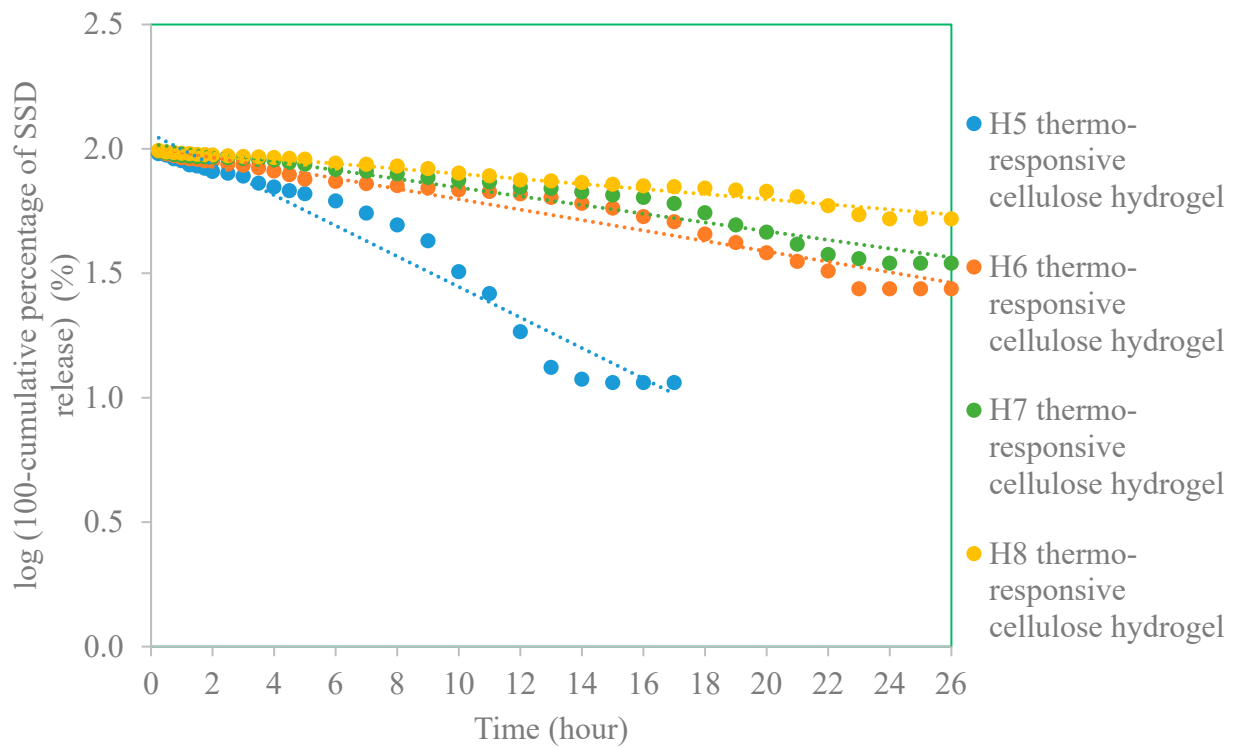

(b)

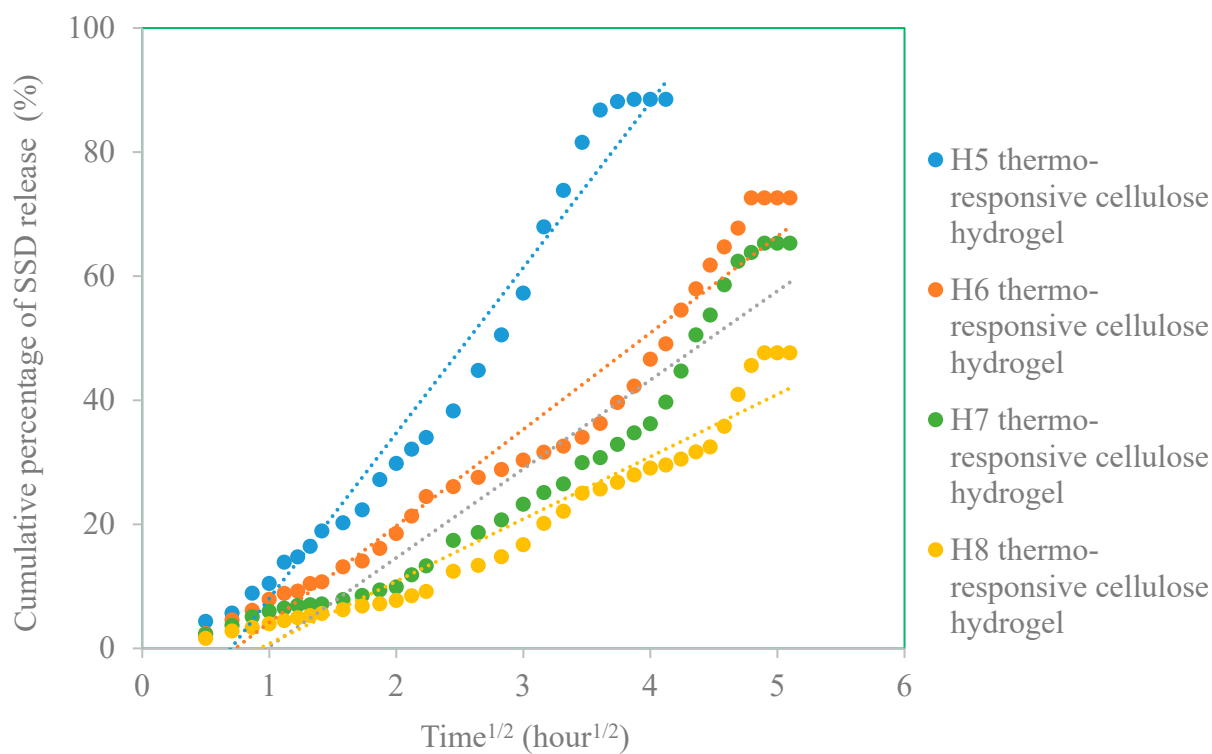

(c)

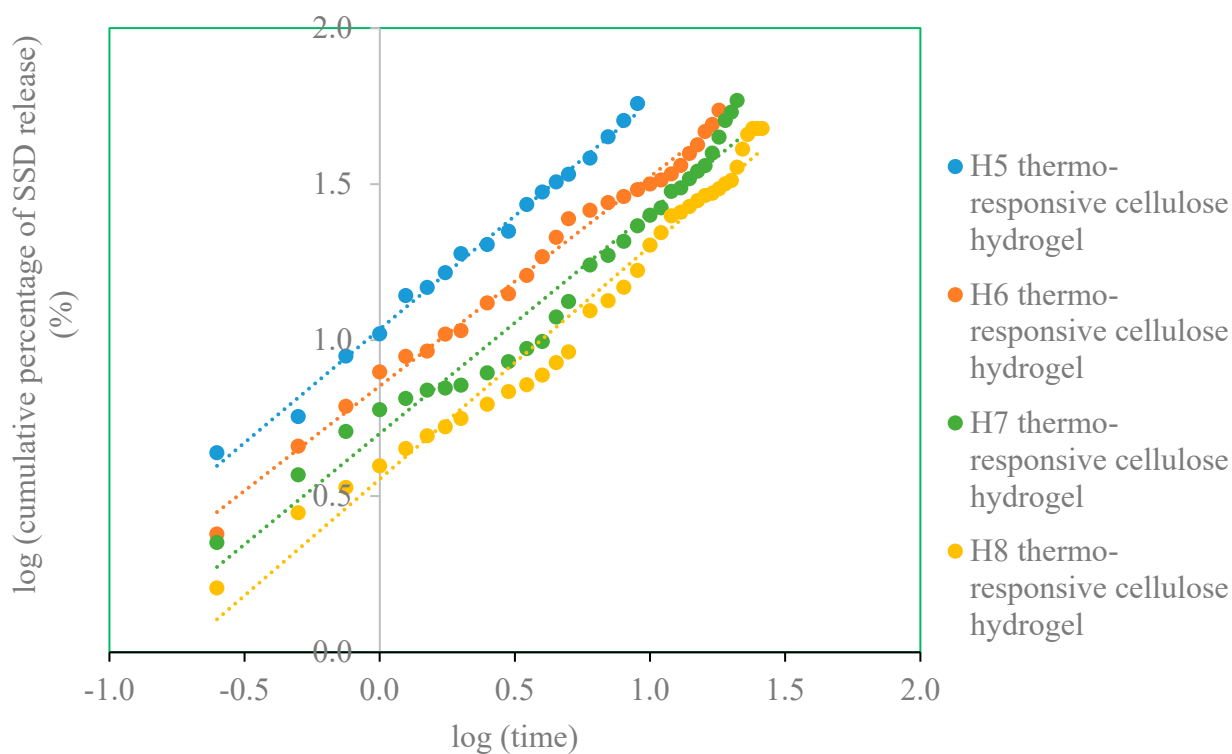

(d)

Figure S3 Linear regression of kinetic and mechanism models (a) Zero-order model (b) First-order model (c) Higuchi model (d) Korsmeyer- peppas model

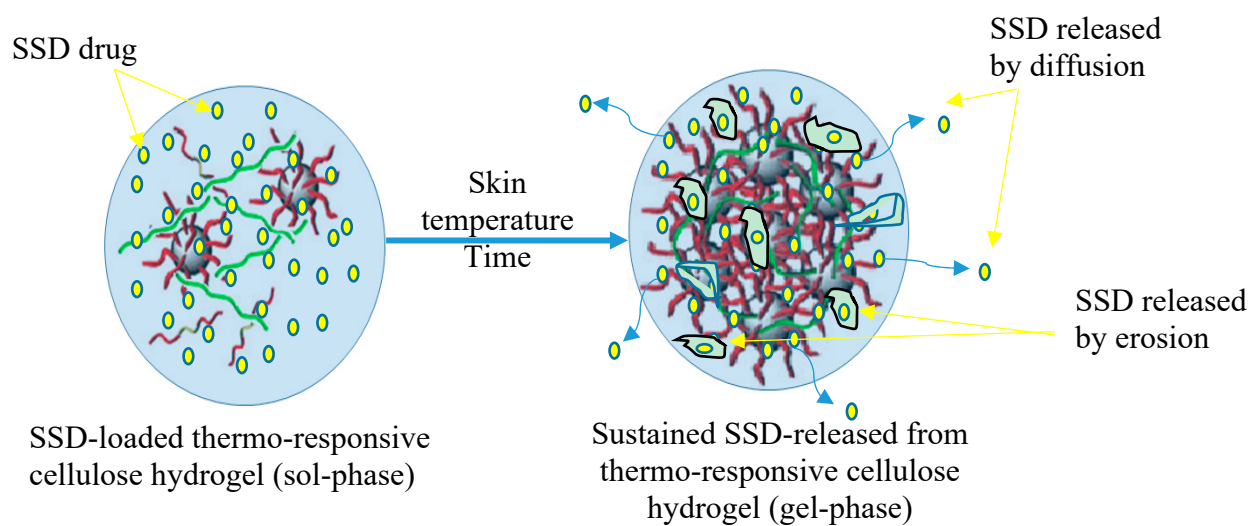

Figure S4 SSD release from thermo-responsive cellulose hydrogels by different mechanisms

Table S1 Concentration of SSD released from thermo-responsive cellulose hydrogels at different time interval

| Time (Hour) | Concentration of SSD (mg/L) |       |       |       |
|-------------|-----------------------------|-------|-------|-------|
|             | H5                          | H6    | H7    | H8    |
| 0.5         | 9.62                        | 7.91  | 6.36  | 4.81  |
| 1.0         | 17.66                       | 13.43 | 10.09 | 6.68  |
| 2.0         | 31.90                       | 17.90 | 11.97 | 9.38  |
| 4.0         | 50.00                       | 31.17 | 16.56 | 12.94 |
| 4.5         | 56.92                       | 41.23 | 22.34 | 15.36 |
| 6.0         | 64.42                       | 43.64 | 29.61 | 21.16 |
| 8.0         | 84.98                       | 48.24 | 34.82 | 24.81 |
